# Supplementary material
Source: Copernicus journal article supplement (doi:10.5194/ejm-38-281-2026)
Supplement: Supplementary file [file ejm-38-281-2026-supplement-title-page.pdf › ejm-38-281-2026-supplement-title-page.pdf]

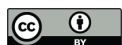

*Supplement of*

**Mineralogy of sulfide mineralization from the world-class Li–Sn–W Cínovec greisen-type deposit, Bohemian Massif, Czech Republic**

**Ondřej Krátký et al.**

*Correspondence to:* Ondřej Krátký (ondra.kratky@gmail.com) and Jan Cempírek (jcemp@sci.muni.cz)

- ejm-38-281-2026-supplement-title-page.pdf
- Supplement - tables with EMPA dat.xlsx

The copyright of individual parts of the supplement might differ from the article licence.
